CORRECTION

# Correction: Antigenic cartography of immune responses to *Plasmodium falciparum* erythrocyte membrane protein 1 (PfEMP1)

The *PLOS Pathogens* Staff

There are a number of errors in the caption for [Fig 2](#), “Antisera maps for IgG and IgM” that arose during typesetting. Please see the complete, correct [Fig 2](#) caption here. The publisher apologizes for the errors.

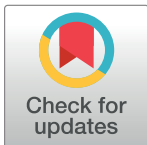

## OPEN ACCESS

**Citation:** The *PLOS Pathogens* Staff (2019) Correction: Antigenic cartography of immune responses to *Plasmodium falciparum* erythrocyte membrane protein 1 (PfEMP1). *PLoS Pathog* 15 (8): e1008018. <https://doi.org/10.1371/journal.ppat.1008018>

**Published:** August 15, 2019

**Copyright:** © 2019 The PLOS Pathogens Staff. This is an open access article distributed under the terms of the [Creative Commons Attribution License](#), which permits unrestricted use, distribution, and reproduction in any medium, provided the original author and source are credited.

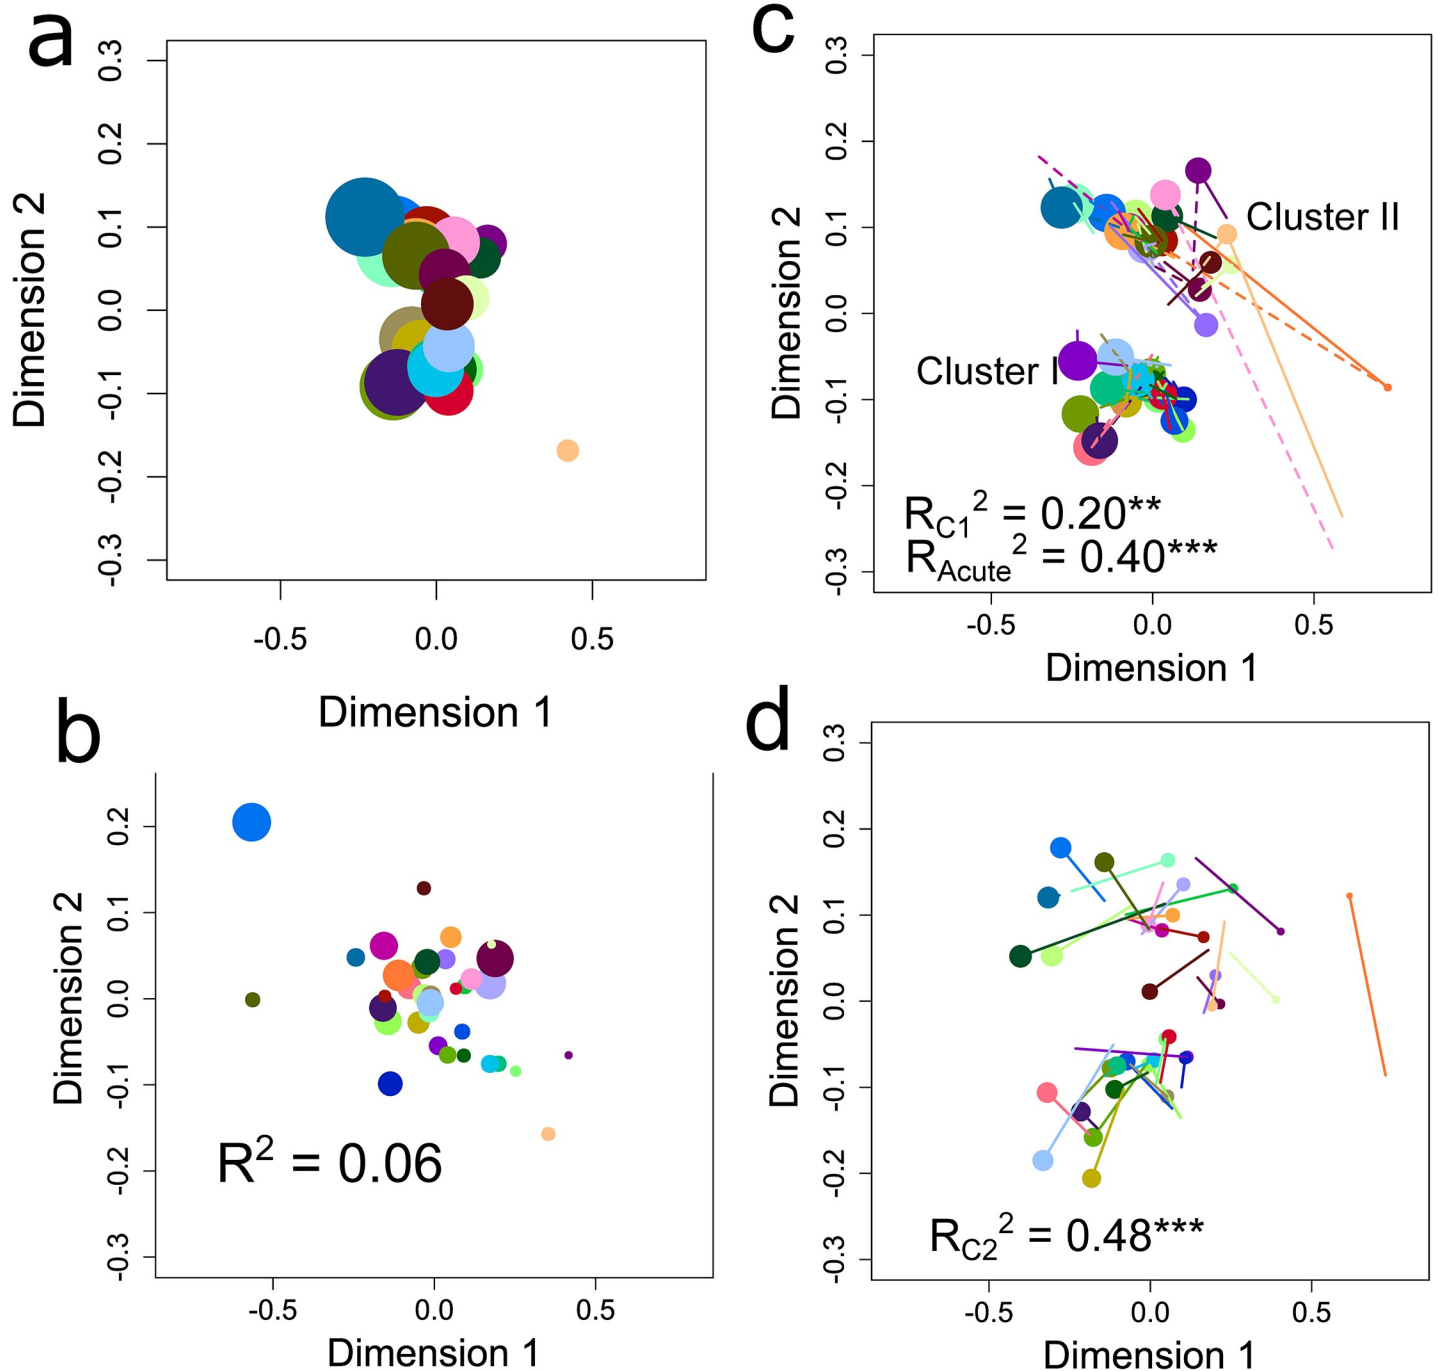

**Fig 2. Antisera maps for IgG and IgM.** Maps were constructed from data on **a**, IgG at the acute timepoint; **b**, IgM at the acute timepoint; **c**, IgG at timepoint C2 (the consensus antisera map); **d**, IgM at timepoint C2. In **c**, solid and dashed lines point to positions in the map for IgG at the acute (as in **a**) and C1 timepoints, respectively. In **d**, solid lines point to positions in the consensus antisera map shown by the points in **c**. Symbol size is proportional to the antisera's average  $\log_{10}$  OD value at the timepoint indicated.  $R^2$  values represent goodness-of-fit to the consensus map with subscripts indicating the timepoint of the map being compared and asterisks indicating significance (\*\*,  $P < 0.01$ ; \*\*\*,  $P < 0.001$ ).

<https://doi.org/10.1371/journal.ppat.1008018.g001>

### Reference

1. Tuju J, Mackinnon MJ, Abdi AI, Karanja H, Musyoki JN, Warimwe GM, et al. (2019) Antigenic cartography of immune responses to *Plasmodium falciparum* erythrocyte membrane protein 1 (PfEMP1). *PLoS Pathog* 15(7): e1007870. <https://doi.org/10.1371/journal.ppat.1007870> PMID: 31260501
